# Supplementary material
Source: PubMed Central journal article supplement (PMC3119128)
Supplement: supp_00328.2010_video_captions.pdf [file supp_00328.2010_video_captions.pdf]

## SUPPLEMENTAL MOVIE CAPTIONS

**SUPPLEMENTAL MOVIE 1. *TIRF microscopy of EGFP-actin reveals hypoxia induced time dependent changes in the actin cytoskeleton.*** Hypoxic exposure was initiated at 5 minutes and cells were returned to normoxia at 40 minutes. Using TIRF, we observed that hypoxia induced time-dependent and reversible increases in the abundance and alignment of basal stress fibers.

**SUPPLEMENTAL MOVIE 2. *TIRF microscopy of EGFP-actin reveals that hypoxia induced changes in the actin cytoskeleton are reversed by zinc chelation.*** Hypoxic exposure was initiated at 5 minutes. The zinc chelator, TPEN (10  $\mu$ M) was added at 40 minutes and induced time dependent disassembly of hypoxia-induced basal stress fibers.
